# Supplementary material
Source: PubMed Central journal article supplement (PMC2040467)
Supplement: pnas_0707585104_1.pdf [file pnas_0707585104_1.pdf]

**Table 2. Effect of mecamylamine and CRF<sub>1</sub> antagonist (MPZP) on behavior in the defensive burying test**

| Behavior (s)    | Treatment | Vehicle + vehicle | CRF <sub>1</sub> antagonist + vehicle | Vehicle + mecamylamine | CRF <sub>1</sub> antagonist + mecamylamine |
|-----------------|-----------|-------------------|---------------------------------------|------------------------|--------------------------------------------|
| Burying         | Nicotine  | 79 ± 36           | 85 ± 42                               | 271 ± 46 *             | 115 ± 24 #                                 |
|                 | Saline    | 133 ± 29          | 145 ± 34                              | 135 ± 39               | 143 ± 20                                   |
| Latency to bury | Nicotine  | 104 ± 31          | 130 ± 36                              | 31 ± 9 *               | 82 ± 19 #                                  |
|                 | Saline    | 84 ± 17           | 104 ± 29                              | 87 ± 25                | 80 ± 18                                    |
| Freezing        | Nicotine  | 1 ± 1             | 13 ± 7                                | 1 ± 1                  | 7 ± 7                                      |
|                 | Saline    | 5 ± 4             | 9 ± 8                                 | 1 ± 1                  | 5 ± 3                                      |
| Grooming        | Nicotine  | 17 ± 9            | 48 ± 18                               | 16 ± 5                 | 38 ± 14                                    |
|                 | saline    | 16 ± 9            | 26 ± 12                               | 30 ± 12                | 15 ± 5                                     |
| Rearing         | Nicotine  | 205 ± 22          | 181 ± 21                              | 105 ± 25               | 126 ± 21                                   |
|                 | Saline    | 179 ± 21          | 183 ± 19                              | 118 ± 14               | 139 ± 7                                    |
| Resting         | Nicotine  | 4 ± 3             | 24 ± 11                               | 49 ± 21                | 68 ± 26                                    |
|                 | Saline    | 40 ± 16           | 11 ± 7                                | 67 ± 24                | 51 ± 22                                    |

\*,  $P < 0.05$  vs. vehicle + vehicle.

#,  $P < 0.05$  vs. vehicle + mecamylamine.
